# Supplementary material
Source: Research Square preprint supplement (doi:10.21203/rs.3.rs-9598769/v1)
Supplement: Supplementary file 1 [file 595b7586024b04cd1647aee4.docx]

APPENDIX

**Interview Guide**

Judul Penelitian: *Persepsi dan Praktik Guru SD Kelas V dalam Mengimplementasikan Buku Teks Bergerak Bersama 2024*

**Durasi** per sesi: Sesi 1: 60–75 menit | Sesi 2: 45–60 menit

**Bahasa:** Bahasa Indonesia

**Format:** Semi-terstruktur: pertanyaan utama wajib diajukan; pertanyaan pendukung diajukan sesuai respons partisipan

**PEMBUKAAN (±5 menit)**

Sampaikankepadapartisipansebelummemulaiwawancara:

*“Terima kasih telah bersedia diwawancarai. Saya ingin memahami pengalaman Bapak/Ibu dalam menggunakan buku teks Bergerak Bersama di kelas V. Tidak ada jawaban yang benar atau salah, saya tertarik dengan pengalaman dan pandangan Bapak/Ibu yang sebenarnya. Wawancara ini akan direkam dan akan dijaga kerahasiaannya. Boleh kita mulai?”*

**KLASTER 1 —** Profil & Latar Belakang

*Tujuan: Membangun rapport dan mengumpulkan data demografis kontekstual.*

1. Sudah berapa lama Bapak/Ibu mengajar di kelas V? Dan apakah ini pertama kalinya menggunakan buku Bergerak Bersama edisi 2024?

Sebelumnya menggunakan buku teks apa? Apa perbedaan paling mencolok yang Bapak/Ibu rasakan?

2. Apakah Bapak/Ibu pernah mengikuti pelatihan atau sosialisasi terkait Kurikulum Merdeka?

*Kalau pernah, pelatihan apa saja yang diikuti? Seberapa membantu pelatihan tersebut dalam memahami buku teks ini?*

3. Apakah Bapak/Ibu pernah mendengar atau mengetahui tentang PISA (Programme for International Student Assessment)?

*Dari mana Bapak/Ibu mengetahuinya? Apakah hal itu memengaruhi cara Bapak/Ibu mengajar?*

**KLASTER 2 — Persepsi** terhadap Buku Teks Bergerak Bersama

*Tujuan: Mengeksplorasi penilaian guru terhadap kualitas, kesesuaian, dan relevansi buku teks.*

4. Secara keseluruhan, apa kesan pertama Bapak/Ibu ketika pertama kali membaca buku Bergerak Bersama edisi 2024 ini?

*Apa yang paling menarik perhatian? Apa yang langsung terasa berbeda dari buku sebelumnya?*

5. Menurut Bapak/Ibu, apakah materi dan tugas-tugas dalam buku ini sesuai dengan kemampuan siswa kelas V di sekolah ini?

*Bagian mana yang terasa terlalu mudah atau terlalu sulit? Mengapa?*

6. Buku Bergerak Bersama dirancang untuk mendorong siswa berpikir kritis dan memecahkan masalah nyata. Sejauh mana Bapak/Ibu merasakan hal itu dalam isi buku ini?

Bisakah Bapak/Ibu memberi contoh konkret, halaman atau bab mana yang menurut Anda berhasil atau kurang berhasil dalam hal ini?

7. Apakah ada bagian dari buku ini yang menurut Bapak/Ibu kurang relevan atau kurang kontekstual bagi kehidupan siswa di sini?

Misalnya, apakah ada contoh atau ilustrasi yang terasa jauh dari keseharian siswa?

8. Jika Bapak/Ibu diminta menilai buku ini dengan skala 1–10 untuk kualitas secara keseluruhan, angka berapa yang Anda berikan? Mengapa?

**KLASTER 3 — Praktik** Implementasi di Kelas

*Tujuan: Memahami bagaimana guru secara nyata menggunakan, mengadaptasi, atau memodifikasi buku teks dalam pembelajaran.*

9. Coba ceritakan bagaimana biasanya Bapak/Ibu menggunakan buku ini dalam satu sesi pembelajaran, dari awal sampai akhir.

Apakah Bapak/Ibu mengikuti urutan buku, atau menyesuaikannya? Bagaimana Bapak/Ibu memutuskan apa yang diikuti dan apa yang diubah?

10. Apakah ada tugas atau aktivitas dalam buku ini yang Bapak/Ibu pilih untuk tidak dilakukan atau diganti dengan sesuatu yang lain?

*Apa alasannya? Apa yang Bapak/Ibu gunakan sebagai penggantinya?*

11. Apakah Bapak/Ibu menambahkan materi atau aktivitas dari luar buku ini? Kalau ya, dari mana sumbernya?

Misalnya, apakah menggunakan internet, LKS tambahan, atau membuat sendiri? Untuk bagian buku mana hal ini paling sering dilakukan?

12. Pernahkah Bapak/Ibu mengajak siswa untuk melakukan kegiatan penyelidikan atau proyek yang terinspirasi dari buku ini, tetapi dikembangkan sendiri oleh Bapak/Ibu?

Ceritakan satu contoh yang paling berkesan. Apa yang membuat Bapak/Ibu memutuskan untuk melakukannya?

13. Bagaimana Bapak/Ibu menggunakan buku ini untuk mata pelajaran yang Bapak/Ibu rasa kurang dikuasai secara mendalam — misalnya matematika atau sains?

Apakah ada strategi khusus yang Bapak/Ibu gunakan?

**KLASTER 4 — Hambatan** dan Tantangan

*Tujuan: Mengidentifikasi faktor-faktor yang menyulitkan implementasi efektif buku teks.*

14. Apa hambatan terbesar yang Bapak/Ibu hadapi dalam menggunakan buku ini secara efektif?

Apakah hambatan itu lebih bersumber dari buku itu sendiri, dari kondisi siswa, dari fasilitas sekolah, atau dari faktor lain?

15. Apakah waktu yang tersedia cukup untuk menyelesaikan semua materi yang ada di buku ini?

Bagaimana Bapak/Ibu mengelola keterbatasan waktu itu? Materi apa yang sering “dikorbankan”?

16. Bagaimana kemampuan awal siswa di kelas Bapak/Ibu memengaruhi cara Anda menggunakan buku ini?

Apakah ada perbedaan yang besar antar siswa? Bagaimana Bapak/Ibu mengatasinya?

17. Apakah ada dukungan dari pihak sekolah, kepala sekolah, rekan guru, atau pengawas, yang membantu atau justru mempersulit penggunaan buku ini?

**KLASTER 5 — Strategi Coping dan Dukungan**

*Tujuan: Mengeksplorasi strategi adaptif dan sumber daya yang dimanfaatkan guru.*

18. Apa strategi yang paling membantu Bapak/Ibu ketika menghadapi bagian buku yang sulit diimplementasikan?

Apakah Bapak/Ibu memiliki “trik” tertentu yang sudah terbukti berhasil?

19. Apakah Bapak/Ibu berdiskusi dengan rekan guru lain tentang cara menggunakan buku ini? Bagaimana bentuk kolaborasi itu?

Apakah ada komunitas belajar (KKG atau sejenisnya) yang membahas buku teks ini secara reguler?

20. Dukungan apa yang Bapak/Ibu butuhkan, tetapi belum tersedia, agar bisa menggunakan buku ini secara lebih efektif?

Misalnya: pelatihan, panduan guru, sumber digital, pengurangan jumlah siswa, dll.

**PENUTUP (±5 menit)**

**21.** Kalau Bapak/Ibu bisa mengubah satu hal dari buku Bergerak Bersama ini, apa yang paling ingin diubah?

**22.** Adakah hal lain tentang pengalaman Bapak/Ibu menggunakan buku ini yang belum sempat kita bahas dan menurut Anda penting untuk diketahui?
